# Supplementary material
Source: PubMed Central journal article supplement (PMC7241868)
Supplement: NIHMS112899-supplement-01.pdf [file NIHMS112899-supplement-01.pdf]

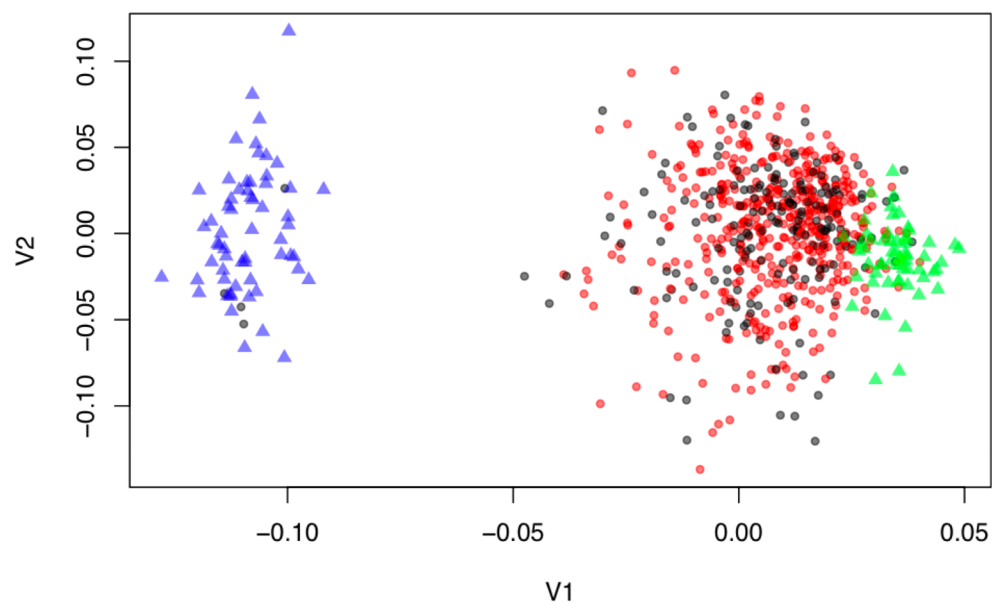

**Supplemental Figure 1:** HIV-infected (red circles) and HIV-uninfected (black circles) African Americans from the ALIVE cohort, compared to 60 European Americans (blue triangles) and 60 Yorubans (green triangles) from the HapMap project, plotted on the axes of the first and second principal components as determined using principal components analysis (EIGENSTRAT (v1 and v2)).

Supplemental Table 1: Allele frequencies in European Americans1, Yorubans2, and African Americans enrolled in the ALIVE cohort.

| Ancestry Informative Marker | African Allele Freq. | Yoruban (YRI) Allele Freq. | European (CEU) Allele Freq. | Freq difference YRI and CEU |
|-----------------------------|----------------------|----------------------------|-----------------------------|-----------------------------|
| rs5955757                   | 0.84                 | 0.99                       | 0.04                        | 0.95                        |
| rs930072                    | 0.18                 | 0.05                       | 0.90                        | 0.85                        |
| rs2249419                   | 0.22                 | 0.93                       | 0.08                        | 0.84                        |
| rs2811337                   | 0.76                 | 0.93                       | 0.11                        | 0.83                        |
| rs4879682                   | 0.85                 | 1.00                       | 0.18                        | 0.82                        |
| rs1462906                   | 0.66                 | 0.83                       | 0.02                        | 0.82                        |
| rs7933164                   | 0.27                 | 0.10                       | 0.89                        | 0.79                        |
| rs4595478                   | 0.77                 | 0.88                       | 0.08                        | 0.79                        |
| rs3830137                   | 0.14                 | 0.07                       | 0.86                        | 0.79                        |
| rs439890                    | 0.67                 | 0.86                       | 0.07                        | 0.79                        |
| rs1626153                   | 0.36                 | 0.21                       | 0.98                        | 0.77                        |
| rs2974190                   | 0.64                 | 0.80                       | 0.03                        | 0.77                        |
| rs867815                    | 0.24                 | 0.09                       | 0.86                        | 0.77                        |
| rs1003229                   | 0.17                 | 0.07                       | 0.82                        | 0.75                        |
| rs1878404                   | 0.79                 | 0.92                       | 0.18                        | 0.74                        |
| rs1894043                   | 0.84                 | 1.00                       | 0.26                        | 0.74                        |
| rs4130513                   | 0.58                 | 0.79                       | 0.05                        | 0.74                        |
| rs5906992                   | 0.09                 | 0.00                       | 0.73                        | 0.73                        |
| rs1151927                   | 0.33                 | 0.19                       | 0.92                        | 0.73                        |
| rs240993                    | 0.84                 | 0.95                       | 0.23                        | 0.73                        |
| rs2045638                   | 0.79                 | 0.97                       | 0.25                        | 0.72                        |
| rs42507                     | 0.87                 | 1.00                       | 0.28                        | 0.72                        |
| rs905646                    | 0.76                 | 0.90                       | 0.18                        | 0.72                        |
| rs3892158                   | 0.35                 | 0.18                       | 0.89                        | 0.71                        |
| rs2294097                   | 0.38                 | 0.26                       | 0.97                        | 0.71                        |
| rs7333151                   | 0.67                 | 0.79                       | 0.08                        | 0.71                        |
| rs727852                    | 0.23                 | 0.09                       | 0.80                        | 0.71                        |
| rs6842695                   | 0.31                 | 0.18                       | 0.88                        | 0.71                        |
| rs2241583                   | 0.82                 | 0.98                       | 0.28                        | 0.71                        |
| rs2249891                   | 0.61                 | 0.77                       | 0.07                        | 0.70                        |
| rs1909808                   | 0.64                 | 0.79                       | 0.09                        | 0.70                        |
| rs920249                    | 0.31                 | 0.17                       | 0.87                        | 0.70                        |
| rs2113807                   | 0.84                 | 0.95                       | 0.25                        | 0.70                        |
| rs758439                    | 0.86                 | 0.93                       | 0.23                        | 0.70                        |
| rs3780293                   | 0.12                 | 0.00                       | 0.69                        | 0.69                        |
| rs535638                    | 0.67                 | 0.82                       | 0.13                        | 0.69                        |
| rs2402526                   | 0.26                 | 0.13                       | 0.82                        | 0.68                        |
| rs953035                    | 0.38                 | 0.26                       | 0.94                        | 0.68                        |
| rs2569107                   | 0.60                 | 0.69                       | 0.01                        | 0.68                        |
| rs1027716                   | 0.65                 | 0.75                       | 0.07                        | 0.68                        |
| rs873893                    | 0.82                 | 0.96                       | 0.28                        | 0.68                        |
| rs943278                    | 0.86                 | 0.96                       | 0.28                        | 0.68                        |
| rs4778140                   | 0.46                 | 0.30                       | 0.98                        | 0.68                        |
| rs678957                    | 0.63                 | 0.74                       | 0.07                        | 0.68                        |
| rs40353                     | 0.33                 | 0.24                       | 0.91                        | 0.67                        |
| rs8046826                   | 0.79                 | 0.91                       | 0.24                        | 0.67                        |
| rs137116                    | 0.12                 | 0.02                       | 0.68                        | 0.66                        |
| rs1031402                   | 0.79                 | 0.93                       | 0.28                        | 0.65                        |
| rs1441236                   | 0.72                 | 0.83                       | 0.18                        | 0.65                        |
| rs322135                    | 0.32                 | 0.23                       | 0.88                        | 0.65                        |
| rs4662260                   | 0.29                 | 0.15                       | 0.80                        | 0.65                        |
| rs3733631                   | 0.72                 | 0.88                       | 0.23                        | 0.65                        |
| rs308956                    | 0.69                 | 0.82                       | 0.18                        | 0.64                        |
| rs3755152                   | 0.37                 | 0.26                       | 0.90                        | 0.64                        |
| rs3571                      | 0.14                 | 0.06                       | 0.70                        | 0.64                        |
| rs3783814                   | 0.82                 | 0.96                       | 0.32                        | 0.64                        |
| rs925331                    | 0.69                 | 0.81                       | 0.17                        | 0.64                        |
| rs195429                    | 0.58                 | 0.72                       | 0.08                        | 0.63                        |
| rs1009799                   | 0.76                 | 0.90                       | 0.27                        | 0.63                        |
| rs455726                    | 0.10                 | 0.02                       | 0.64                        | 0.63                        |
| rs1407569                   | 0.55                 | 0.73                       | 0.11                        | 0.63                        |
| rs3789882                   | 0.57                 | 0.29                       | 0.92                        | 0.63                        |
| rs927329                    | 0.68                 | 0.78                       | 0.16                        | 0.63                        |
| rs165335                    | 0.29                 | 0.16                       | 0.78                        | 0.62                        |
| rs173537                    | 0.33                 | 0.13                       | 0.75                        | 0.62                        |
| rs2124036                   | 0.20                 | 0.11                       | 0.73                        | 0.62                        |
| rs259251                    | 0.21                 | 0.13                       | 0.74                        | 0.61                        |
| rs764657                    | 0.85                 | 0.99                       | 0.38                        | 0.61                        |
| rs799912                    | 0.18                 | 0.03                       | 0.64                        | 0.61                        |
| rs1979813                   | 0.41                 | 0.28                       | 0.88                        | 0.60                        |

1CEPH European Americans from Utah and 2 Yorubans from Nigeria, allele frequencies are from the International HapMap project.
